# Supplementary material for: Reversal of phenotypes of cellular senescence by pan-mTOR inhibition
Source: PubMed Central journal article supplement (PMC4789579; doi:10.18632/aging.100872), 2016-02-05
Supplement: aging-08-231-s001.pdf [file aging-08-231-s001.pdf]

## SUPPLEMENTARY FIGURE

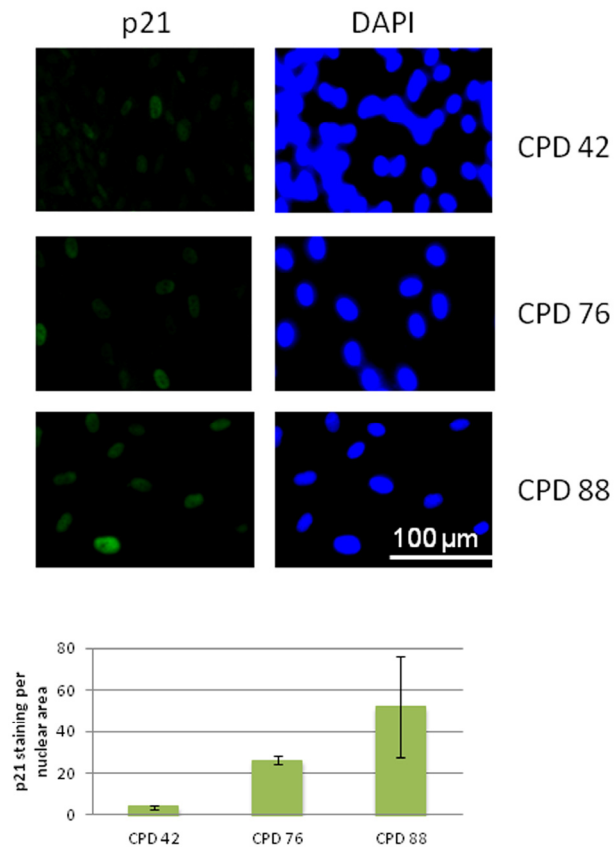

**Supplementary Figure 1. Increase in senescent fraction shown by increase in p21 staining.** HF043 fibroblasts were grown to CPD42, 76 or 88 and fixed prior to staining for p21. ImageJ quantification of p21 staining over nuclear area is shown in the graph (mean +/- standard deviation).
